# Supplementary material for: Identification of prognostic biomarkers in glioblastoma using a long non-coding RNA-mediated, competitive endogenous RNA network
Source: PubMed Central journal article supplement (PMC5173092; doi:10.18632/oncotarget.9569), 2016-05-24
Supplement: oncotarget-07-41737-s001.pdf [file oncotarget-07-41737-s001.pdf]

# Identification of prognostic biomarkers in glioblastoma using a long non-coding RNA-mediated, competitive endogenous RNA network

## Supplementary Materials

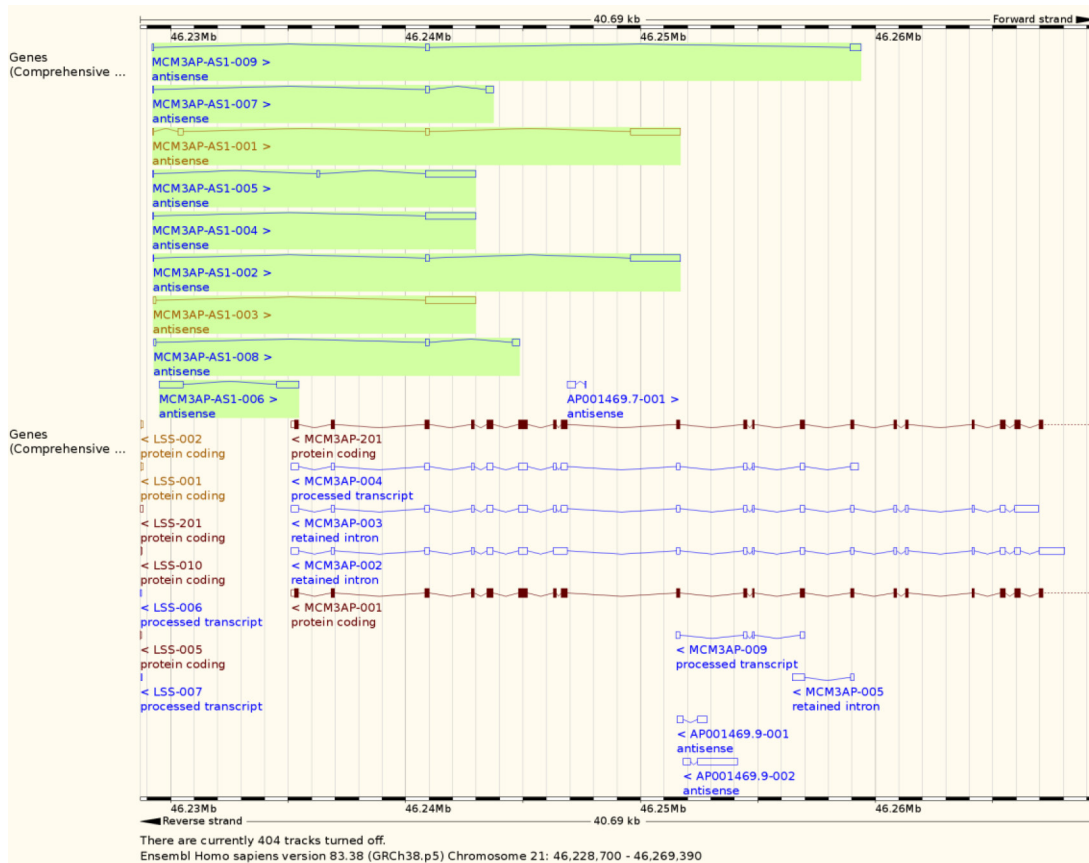

Supplementary Figure S1: Genomic location of MCM3AP and MCM3AP-AS according to Ensembl Genome Browser.
